# Supplementary material for: Design and evaluation of a custom 50K Infinium SNP array for egg-type chickens
Source: PubMed Central journal article supplement — Poult Sci. 2021 Feb 16;100(5):101044. doi: 10.1016/j.psj.2021.101044 (PMC8010521; doi:10.1016/j.psj.2021.101044), 2021-02-16

**Figure S1** Overlapped SNPs between Yangzhou (F2) and Yukou (Pure line) after quality control.

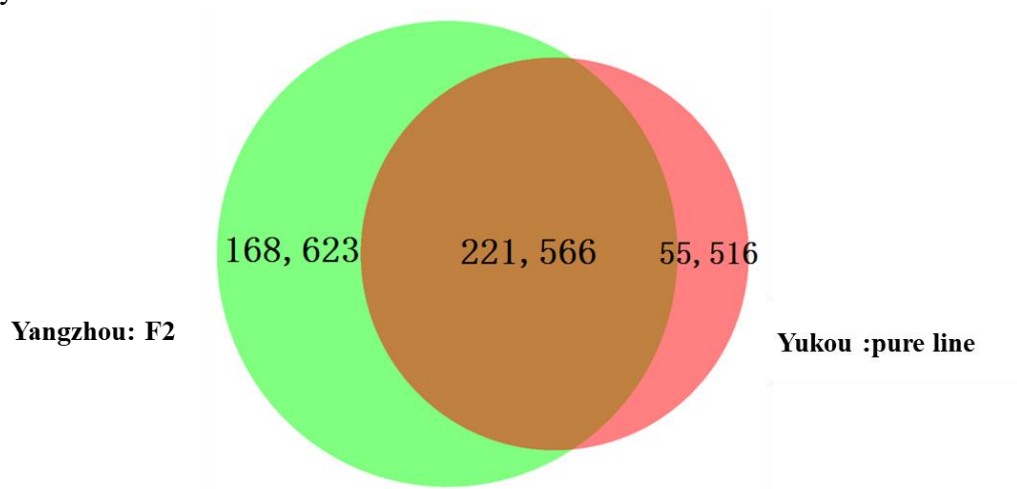

**Table S1** Distribution and parameter of space setting between SNPs on the custom 50K SNP array (Based on Gallus-gallus6.0).

| CHROM | Length(bp)  | NO.SNPs | Space settings(bp) | Actual Space(bp) | Max(bp)   | Min(bp) |
|-------|-------------|---------|--------------------|------------------|-----------|---------|
| chr1  | 197,677,740 | 7,683   | 20,000             | 25,676.52        | 704,460   | 552     |
| chr2  | 149,682,049 | 5,839   | 20,000             | 25,552.15        | 1,130,114 | 62      |
| chr3  | 110,854,228 | 4,523   | 20,000             | 24,404.47        | 684,165   | 40      |
| chr4  | 91,315,245  | 3,909   | 20,000             | 23,136.59        | 522,262   | 94      |
| chr5  | 59,809,098  | 2,537   | 20,000             | 23,379.82        | 653,705   | 28      |
| chr6  | 36,428,957  | 1,809   | 15,000             | 19,284.12        | 930,620   | 73      |
| chr7  | 36,742,308  | 1,956   | 15,000             | 18,399.28        | 526,588   | 150     |
| chr8  | 30,219,446  | 1,394   | 15,000             | 21,188.97        | 555,602   | 425     |
| chr9  | 24,181,049  | 1,243   | 15,000             | 18,978.08        | 521,893   | 140     |
| chr10 | 21,119,840  | 1,354   | 12,000             | 14,615.46        | 516,979   | 457     |
| chr11 | 20,200,042  | 1,280   | 12,000             | 15,583.60        | 536,886   | 484     |
| chr12 | 20,387,278  | 1,375   | 12,000             | 14,057.78        | 306,511   | 148     |
| chr13 | 19,168,871  | 1,092   | 12,000             | 15,188.01        | 1,594,123 | 101     |
| chr14 | 16,220,073  | 990     | 12,000             | 14,174.40        | 52,287    | 32      |
| chr15 | 13,064,218  | 1,193   | 9,000              | 10,242.42        | 80,489    | 153     |
| chr16 | 2,994,104   | 54      | 9,000              | 15,390.57        | 263,840   | 24      |
| chr17 | 10,762,512  | 828     | 9,000              | 11,261.19        | 243,961   | 131     |
| chr18 | 11,373,140  | 914     | 9,000              | 11,889.74        | 97,515    | 1,100   |
| chr19 | 10,324,343  | 854     | 9,000              | 11,737.33        | 173,683   | 929     |
| chr20 | 13,897,287  | 1,061   | 9,000              | 12,543.49        | 173,589   | 855     |
| chr21 | 6,844,979   | 604     | 9,000              | 11,173.89        | 69,785    | 26      |
| chr22 | 5,460,380   | 342     | 9,000              | 14,777.48        | 731,461   | 1,628   |
| chr23 | 6,202,910   | 373     | 9,000              | 16,006.10        | 1,242,629 | 1,980   |
| chr24 | 6,491,222   | 490     | 9,000              | 11,829.76        | 62,570    | 1,482   |
| chr25 | 3,982,494   | 148     | 9,000              | 26,114.44        | 783,966   | 2,389   |
| chr26 | 6,055,710   | 758     | 6,000              | 6,714.04         | 49,694    | 151     |
| chr27 | 8,080,432   | 522     | 6,000              | 9,127.74         | 204,149   | 121     |
| chr28 | 5,118,401   | 650     | 6,000              | 7,004.24         | 71,261    | 32      |
| chr30 | 1,818,525   | 1       | --                 | --               | --        | --      |
| chr31 | 6,185,160   | 141     | 6,000              | 6,283.31         | 101,762   | 387     |
| chr32 | 725,831     | 13      | 6,000              | 7,853.00         | 44,545    | 1,394   |
| chr33 | 7,821,848   | 258     | 6,000              | 17,839.93        | 1,729,648 | 134     |
| chrZ  | 82,545,508  | 3,639   | 20,000             | 22,465.72        | 2,342,602 | 217     |

**Figure S2** The decay of linkage disequilibrium in different chromosomes.

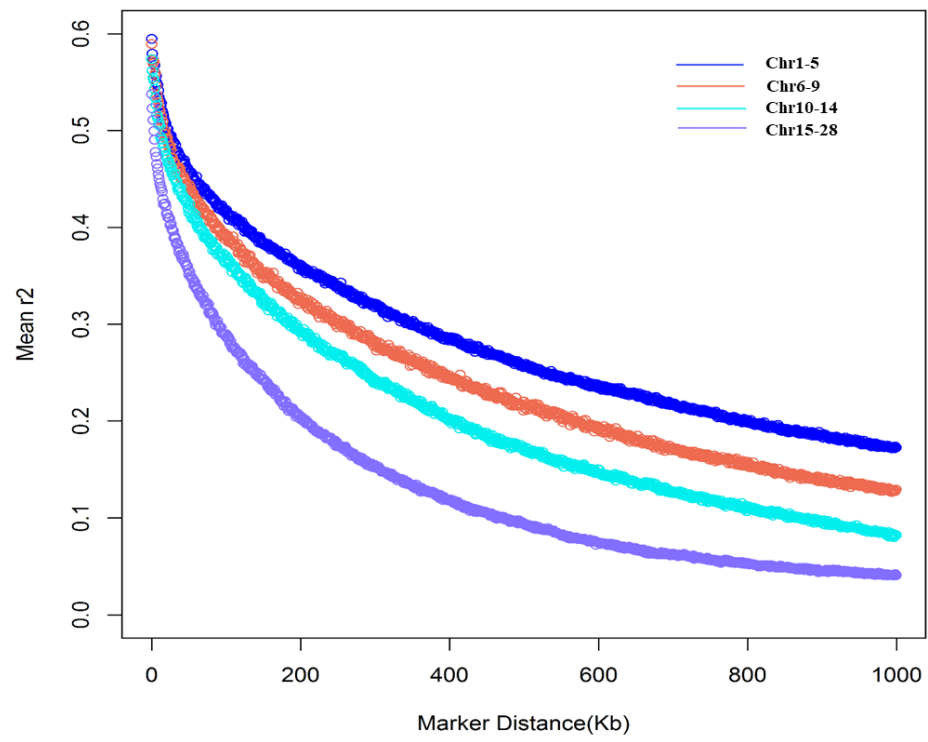

**Figure S3** Manhattan plot of genome-wide association study for EW36. The horizontal red line and black line indicated the genome-wide significant threshold ( $8.1e-06$ ) and genome-wide suggestive significant threshold ( $1.62e-04$ ), respectively. The Manhattan plot indicates  $-\log_{10}$  (observed P-values) for genome-wide SNP (y-axis) against their corresponding position on each chromosome (x-axis).

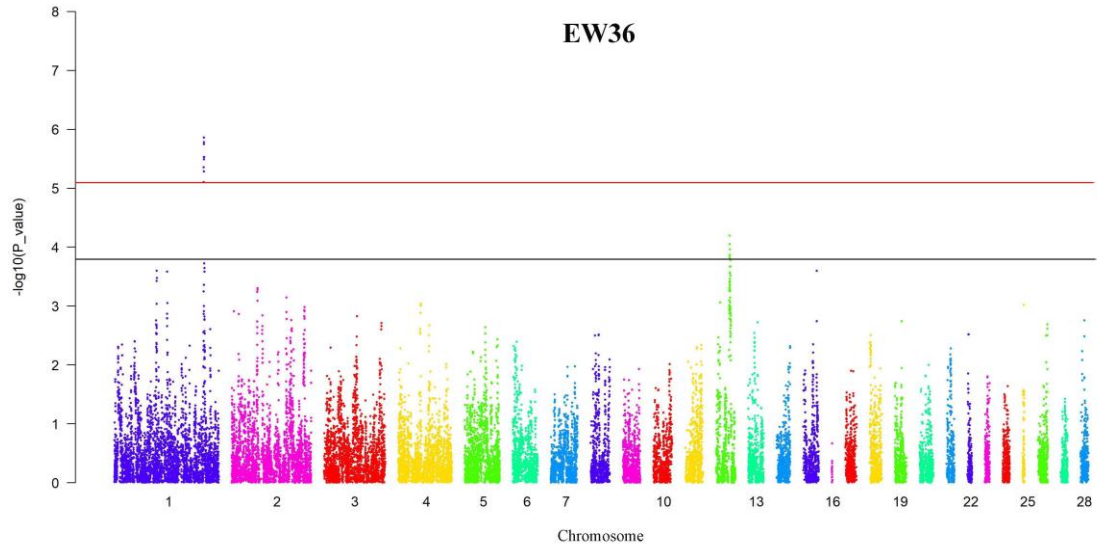

Supplement: mmc1.pdf [file mmc1.pdf]
